# Supplementary material for: Diverse Action of Selected Statins on Skeletal Muscle Cells—An Attempt to Explain the Protective Effect of Geranylgeraniol (GGOH) in Statin-Associated Myopathy (SAM)
Source: PubMed Central journal article supplement (PMC6572681; doi:10.3390/jcm8050694), 2019-05-16
Supplement: jcm-08-00694-s001.pdf [file jcm-08-00694-s001.pdf]

Day 1

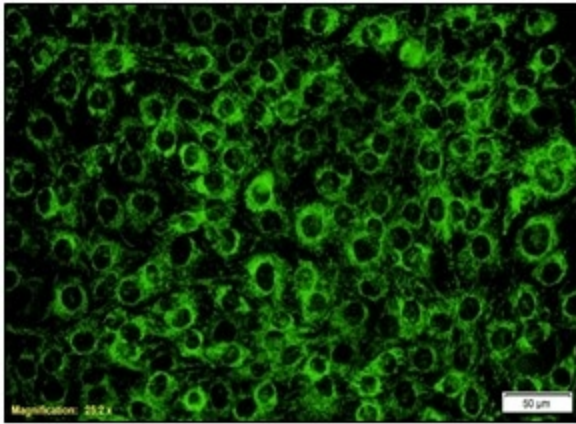

CTRL

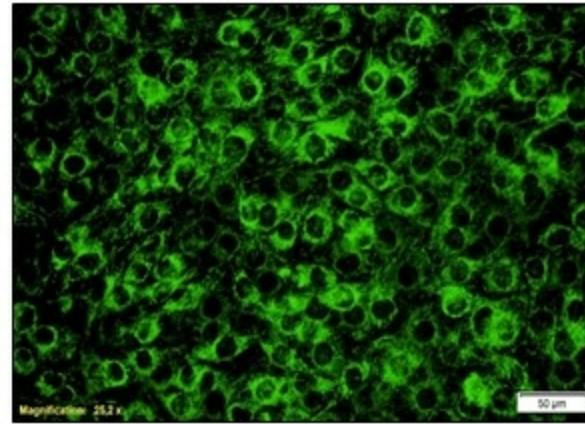

CTRL+DMSO

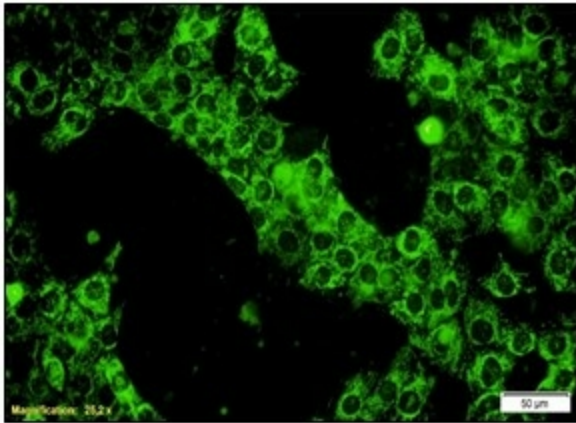

ATR

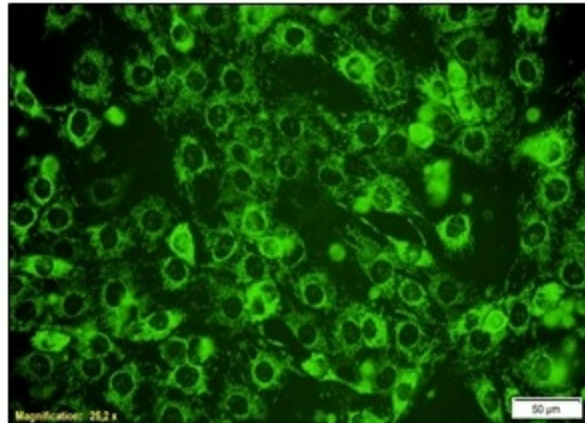

ATR+GGOH

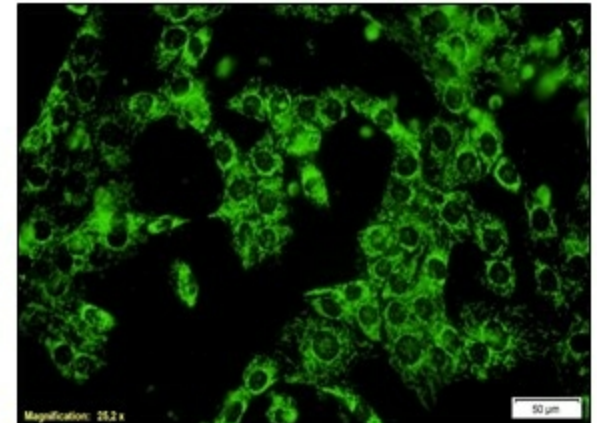

ATR+Chol-PEG

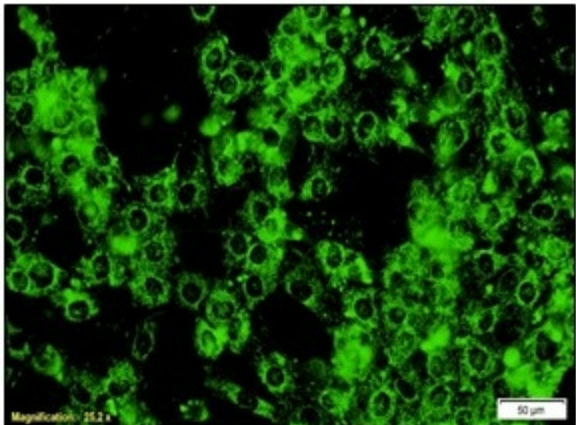

SIM

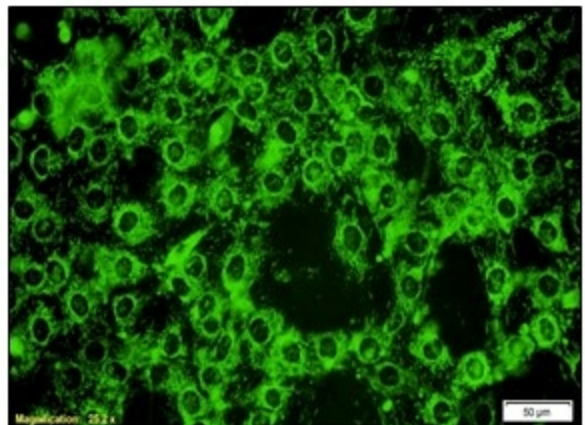

SIM+GGOH

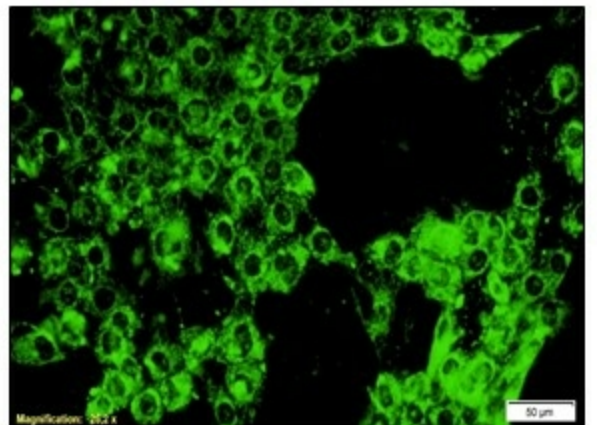

SIM+Chol-PEG

Day 3

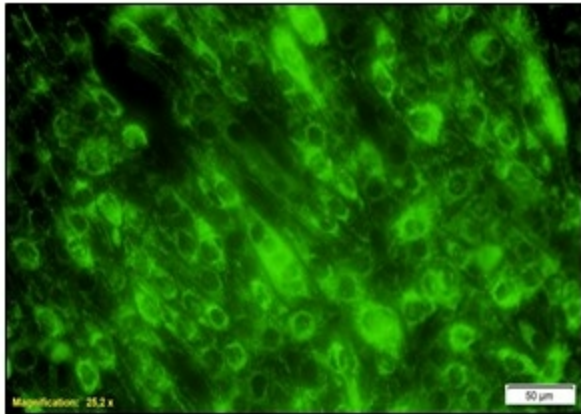

CTRL

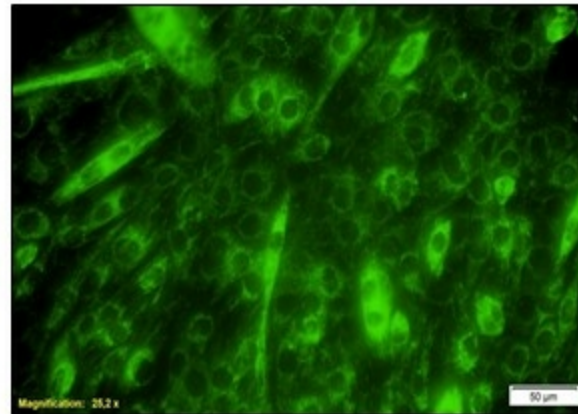

CTRL+DMSO

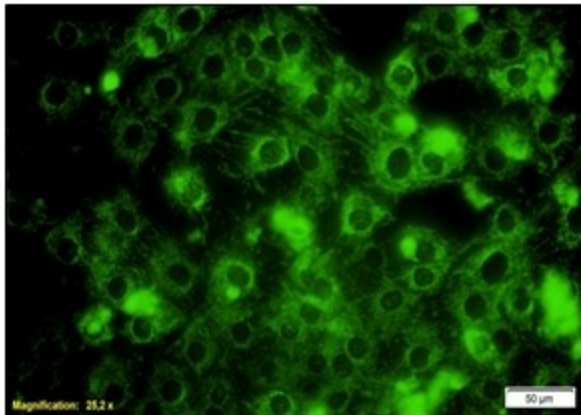

ATR

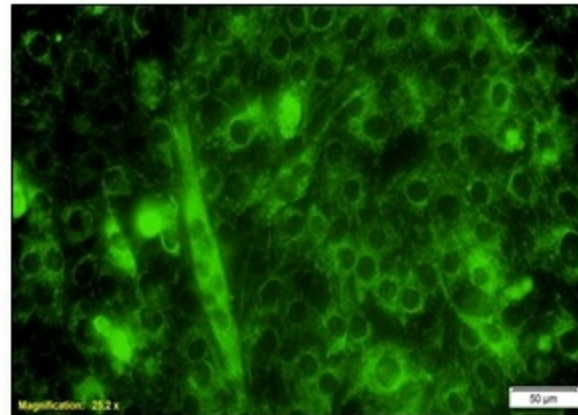

ATR+GGOH

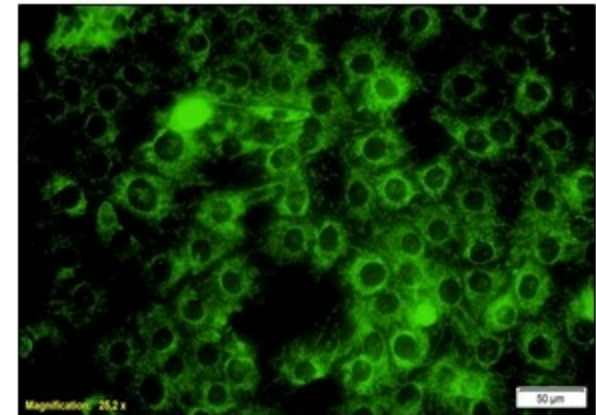

ATR+Chol-PEG

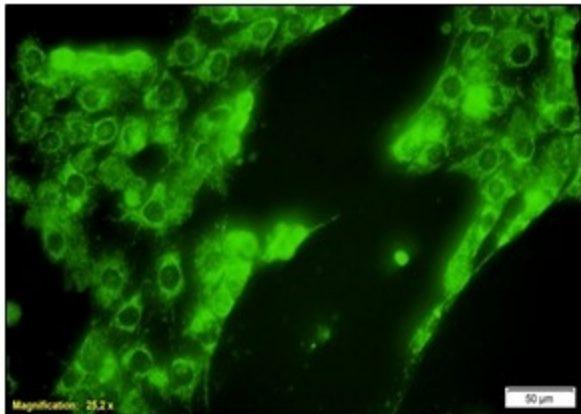

SIM

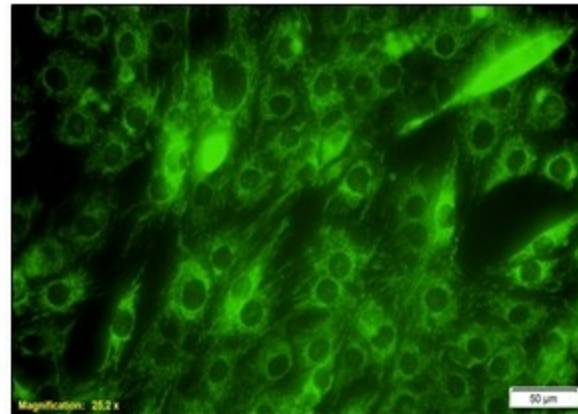

SIM+GGOH

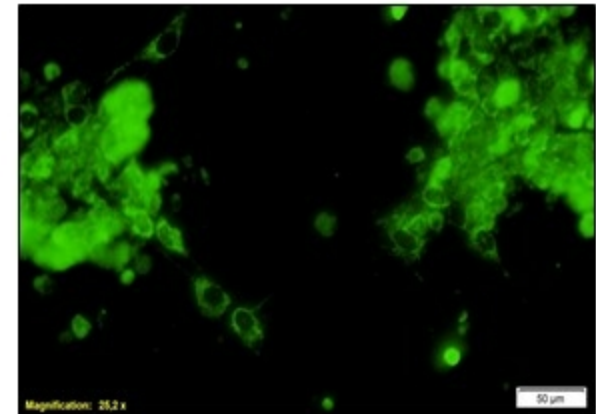

SIM+Chol-PEG

Day 5

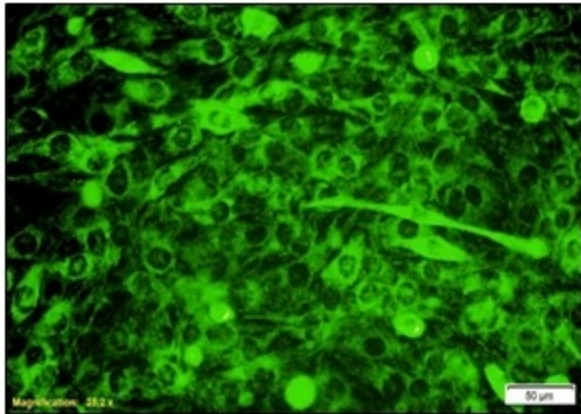

CTRL

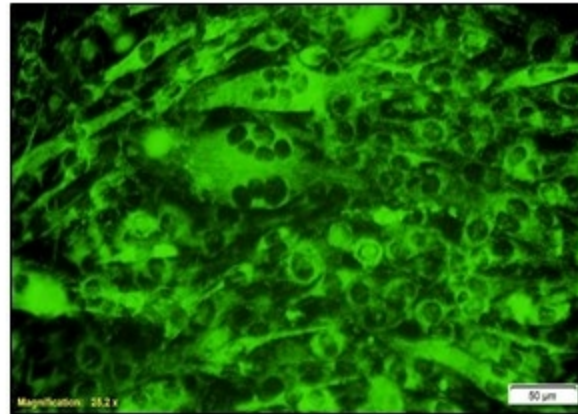

CTRL+DMSO

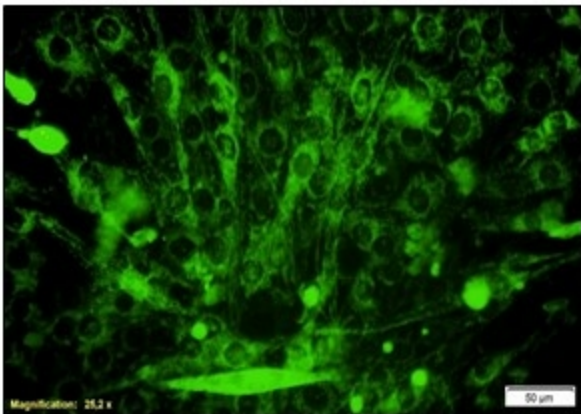

ATR

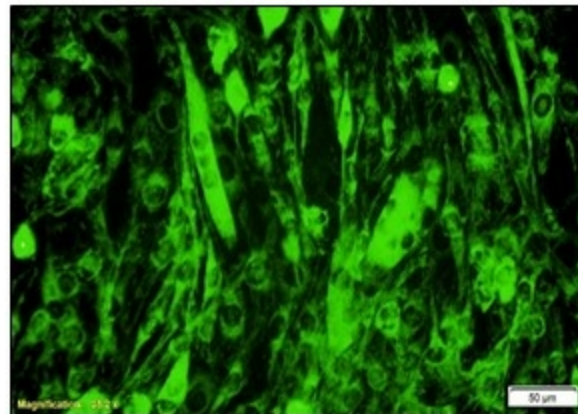

ATR+GGOH

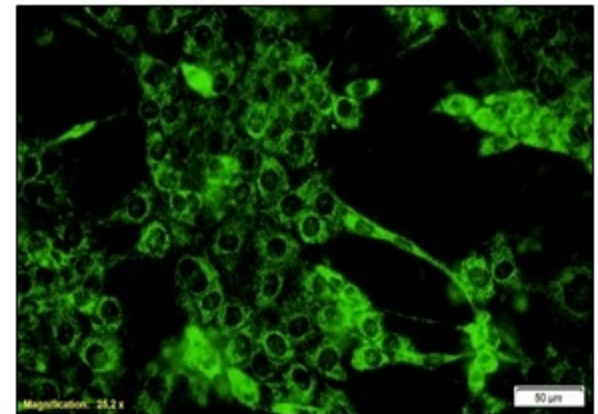

ATR+Chol-PEG

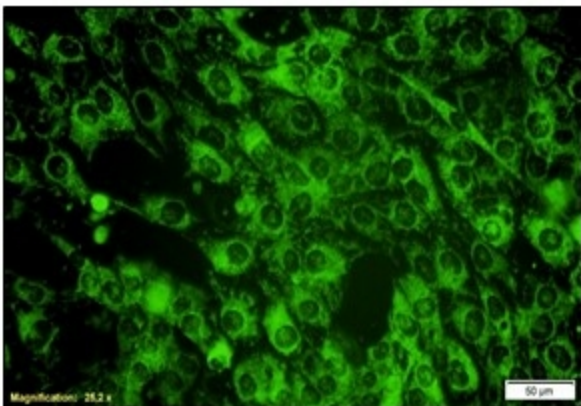

SIM

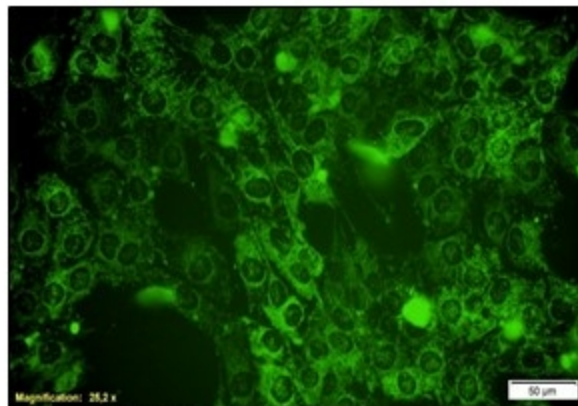

SIM+GGOH

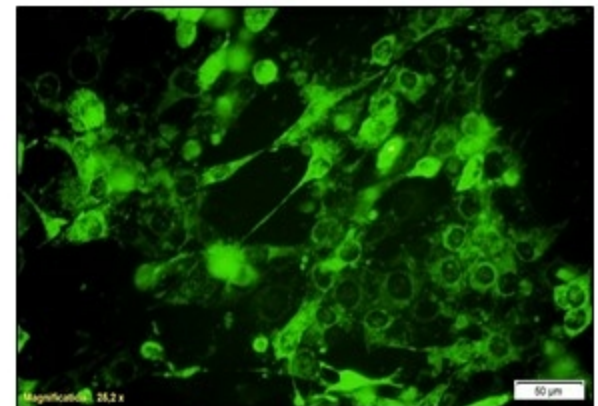

SIM+Chol-PEG
